# Supplementary material
Source: publisher site journal article supplement (https://www.dovepress.com/article/425674)
Supplement: Supplementary file 1 [file get_supplementary_file.php]

**Supplementary Table S1.** Baseline characteristics

| Characteristics                         | Total (n=93)         | High-AFP (n=77)        | High-DCP (n=76)      |
|-----------------------------------------|----------------------|------------------------|----------------------|
| Sex (male)                              | 83 (89.2)            | 68 (88.3)              | 73 (96.1)            |
| Median age (years)                      | 56 (22–88)           | 55 (22–88)             | 55 (22–88)           |
| HBV positive                            | 86 (92.5)            | 71 (92.2)              | 72 (94.7)            |
| PS (0/1)                                | 71 (76.3)/22 (23.7)  | 59 (76.6)/18 (23.4)    | 62 (81.6)/14 (18.4)  |
| ALBI grade (I/II)                       | 49 (52.7)/44 (47.3)  | 38 (49.4)/39 (50.6)    | 43 (56.6)/33 (43.4)  |
| BCLC stage (B/C)                        | 33 (35.5)/60 (64.5)  | 25 (32.5)/52 (67.5)    | 24 (31.6)/52 (68.4)  |
| Tumor size (cm)                         | 9.4 (2.0–22.0)       | 9.7 (2.2–22.0)         | 9.1 (2.0–22.0)       |
| Tumor number (solitary/multiple)        | 8 (8.6)/85 (91.4)    | 5 (6.5)/72 (93.5)      | 5 (6.6)/71 (93.4)    |
| Macrovascular invasion                  | 55 (59.1)            | 48 (62.3)              | 47 (61.8)            |
| WBC count ( $\times 10^9/L$ )           | 6.3 (2.4–13.7)       | 6.3 (2.4–13.7)         | 6.4 (2.7–13.7)       |
| Hemoglobin (g/L)                        | 143 (77–192)         | 140 (77–192)           | 145 (81–192)         |
| Platelet count ( $\times 10^9/L$ )      | 196 (29–598)         | 196 (29–598)           | 197 (46–598)         |
| ALT (U/L)                               | 41.0 (9.8–178.0)     | 40.0 (9.8–178.0)       | 41.0 (15.0–178.0)    |
| AST (U/L)                               | 54.0 (21.0–356.6)    | 54.0 (21.0–356.6)      | 49.0 (22.0–269.0)    |
| Albumin (g/L)                           | 40.0 (29.8–57.0)     | 40.0 (29.8–57.0)       | 41.0 (30.0–57.0)     |
| Total bilirubin ( $\mu\text{mol/L}$ )   | 14.6 (3.3–45.0)      | 15.2 (4.3–44.7)        | 14.6 (3.3–45.0)      |
| AFP (ng/mL)                             | 696.1 (1.8–778724.8) | 1985.2 (10.5–778724.8) | 999.5 (1.8–778724.8) |
| DCP (mAU/mL)                            | 6874 (26–75000)      | 15774 (26–7500)        | 7337 (44–75000)      |
| AFP reduction>50%                       |                      | 56 (72.7)              |                      |
| DCP reduction>50%                       |                      |                        | 58 (76.3)            |
| ORR                                     | 72 (77.4)            | 58 (75.3)              | 60 (78.9)            |
| Sintilimab                              | 28/37 (75.7)         | 23/32 (71.9)           | 24/32 (75.0)         |
| Tislelizumab                            | 14/19 (73.7)         | 10/14 (71.4)           | 13/17 (76.5)         |
| Camrelizumab                            | 19/24 (79.2)         | 16/20 (80.0)           | 12/16 (75.0)         |
| Pembrolizumab                           | 2/2 (100.0)          | 2/2 (100.0)            | 2/2 (100.0)          |
| Toripalimab                             | 9/11 (81.8)          | 7/9 (77.8)             | 9/9 (100.0)          |
| Main reason for conversion therapy      |                      |                        |                      |
| Bilobar tumor locations                 | 33(35.5)             | 27 (35.1)              | 25 (32.9)            |
| Lesions could not be radically resected | 24 (25.8)            | 21 (27.3)              | 23 (30.3)            |
| Extrahepatic metastasis                 | 18 (19.4)            | 14 (18.2)              | 16 (21.1)            |

---

|                                                      |           |           |           |
|------------------------------------------------------|-----------|-----------|-----------|
| Anticipated insufficient future liver remnant volume | 18 (19.4) | 15 (19.5) | 12 (15.8) |
|------------------------------------------------------|-----------|-----------|-----------|

---

Data are expressed as median (range) or n (%).

Abbreviations: HBV, hepatitis B virus; PS, performance status; ALBI, albumin–bilirubin; BCLC, Barcelona Clinic Liver Cancer staging; WBC, white blood cell; ALT, alanine aminotransferase; AST, aspartate aminotransferase; AFP, alpha-fetoprotein; DCP, des-gamma-carboxyprothrombin; ORR, objective response rate

**Supplementary Table S2.** Relationship between treatment response and response of tumor markers

| Response        | Total<br>(n=93) | High-AFP group (AFP $\geq$ 10 ng/mL) |                            |                                | High-DCP group (DCP $\geq$ 40 mAU/mL) |                            |                                |
|-----------------|-----------------|--------------------------------------|----------------------------|--------------------------------|---------------------------------------|----------------------------|--------------------------------|
|                 |                 | Total<br>(n=77)                      | AFP<br>responder<br>(n=56) | AFP<br>non-responder<br>(n=21) | Total<br>(n=76)                       | DCP<br>responder<br>(n=58) | DCP<br>non-responder<br>(n=18) |
| CR              | 18              | 16                                   | 16                         | 0                              | 14                                    | 14                         | 0                              |
| PR              | 54              | 42                                   | 34                         | 8                              | 46                                    | 39                         | 7                              |
| SD              | 9               | 7                                    | 3                          | 4                              | 7                                     | 3                          | 4                              |
| PD              | 12              | 12                                   | 3                          | 9                              | 9                                     | 2                          | 7                              |
| ORR (%)         | 77.4            | 75.3                                 | 89.3                       | 38.1                           | 78.9                                  | 91.4                       | 38.9                           |
| <i>p</i> -Value |                 |                                      | <b>0.000</b>               |                                |                                       | <b>0.000</b>               |                                |

Abbreviations: CR, complete response; PR, partial response; SD, stable disease; PD, progressive disease; ORR, objective response rate; AFP, alpha-fetoprotein; DCP, des-gamma-carboxyprothrombin  
Bold values are statistically significant ( $p < 0.05$ ).

**Supplementary Table S3.** Univariate and multivariate analysis for progression-free survival in the high-AFP group (n=77)

| Variables                    | Univariate          |                 | Multivariate        |                 |
|------------------------------|---------------------|-----------------|---------------------|-----------------|
|                              | HR (95% CI)         | <i>p</i> -Value | HR (95% CI)         | <i>p</i> -value |
| Sex (male)                   | 1.801 (0.553–5.873) | 0.329           |                     |                 |
| Age (≥65 years)              | 0.401 (0.157–1.029) | 0.057           | 0.446 (0.172–1.155) | 0.096           |
| PS (I)                       | 1.604(0.776–3.314)  | 0.202           |                     |                 |
| ALBI grade (II)              | 2.119 (1.107–4.055) | <b>0.023</b>    | 1.902 (0.981–3.688) | 0.057           |
| BCLC (C)                     | 1.644 (0.800–3.377) | 0.176           |                     |                 |
| Tumor size (mm) (≥50)        | 1.890 (0.671–5.323) | 0.228           |                     |                 |
| Tumor number(multiple)       | 1.796 (0.432–7.466) | 0.420           |                     |                 |
| Macrovascular invasion (yes) | 1.500 (0.770–2.921) | 0.233           |                     |                 |
| AFP (ng/mL) (≥400)           | 1.217 (0.625–2.372) | 0.563           |                     |                 |
| AFP reduction>50% (yes)      | 0.305 (0.160–0.583) | <b>0.000</b>    | 0.377 (0.195–0.731) | <b>0.004</b>    |

Abbreviations: HR, hazard ratio; CI, confidence interval; PS, performance status; ALBI, albumin–bilirubin; BCLC, Barcelona Clinic Liver Cancer staging; AFP, alpha-fetoprotein

Bold values are statistically significant (p<0.05).

**Supplementary Table S4.** Univariate and multivariate analysis for progression-free survival in the high-DCP group (n=76)

| Variables                    | Univariate           |                 | Multivariate        |                 |
|------------------------------|----------------------|-----------------|---------------------|-----------------|
|                              | HR (95% CI)          | <i>p</i> -Value | HR (95% CI)         | <i>p</i> -value |
| Sex (male)                   | 2.684 (0.639–11.272) | 0.177           |                     |                 |
| Age (≥65 years)              | 0.386 (0.151–0.988)  | <b>0.047</b>    | 0.447 (0.167–1.194) | 0.108           |
| PS (1)                       | 1.884 (0.920–3.856)  | 0.083           | 2.133 (1.017–4.476) | <b>0.045</b>    |
| ALBI grade (II)              | 2.105 (1.135–3.902)  | <b>0.018</b>    | 1.849 (0.983–3.479) | 0.057           |
| BCLC (C)                     | 1.625 (0.796–3.320)  | 0.183           |                     |                 |
| Tumor size (mm) (≥50)        | 0.982 (0.432–2.228)  | 0.965           |                     |                 |
| Tumor number(multiple)       | 1.714 (0.522–5.622)  | 0.374           |                     |                 |
| Macrovascular invasion (yes) | 1.374 (0.727–2.595)  | 0.328           |                     |                 |
| DCP (mAU/mL) (≥400)          | 1.435 (0.632–3.261)  | 0.388           |                     |                 |
| DCP reduction>50% (yes)      | 0.243 (0.126–0.471)  | <b>0.000</b>    | 0.307 (0.154–0.609) | <b>0.001</b>    |

Abbreviations: HR, hazard ratio; CI, confidence interval; PS, performance status; ALBI, albumin–bilirubin; BCLC, Barcelona Clinic Liver Cancer staging; DCP, des-gamma-carboxyprothrombin  
 Bold values are statistically significant ( $p < 0.05$ ).
